# Supplementary material
Source: publisher figshare collection journal article supplement (https://plos.figshare.com/articles/dataset/_/1001075)
Supplement: Supplementary file [file 1]

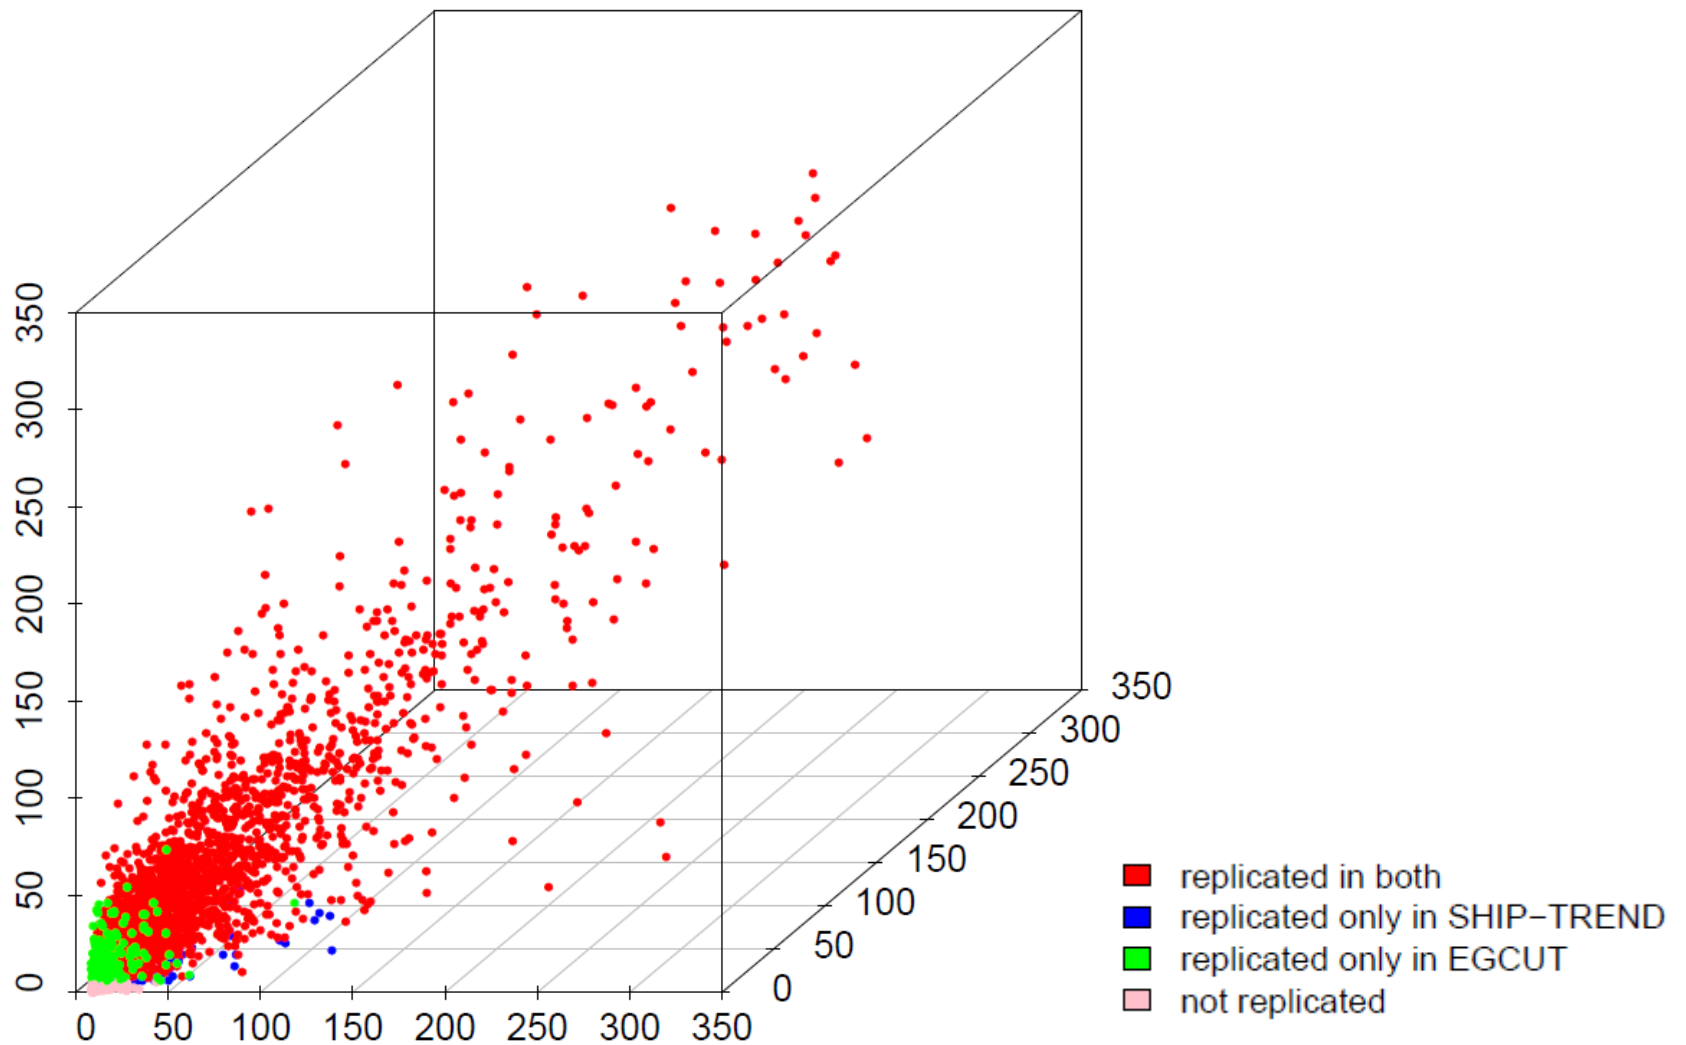

Suppl. Figure 2. X-, Y, and Z-axis present p-values for KORA F4, SHIP-TREND, and EGCUT, respectively.
